# Supplementary material
Source: Springer Nature journal article supplement (https://www.springermedizin.de/resource/supplementary/13046_2012_562_MOESM5_ESM.pdf/9662454)

# All patients

**BAG-1**

**Progression-free survival (%)**

**Negative expression**

**Positive expression**

**Time (months)**

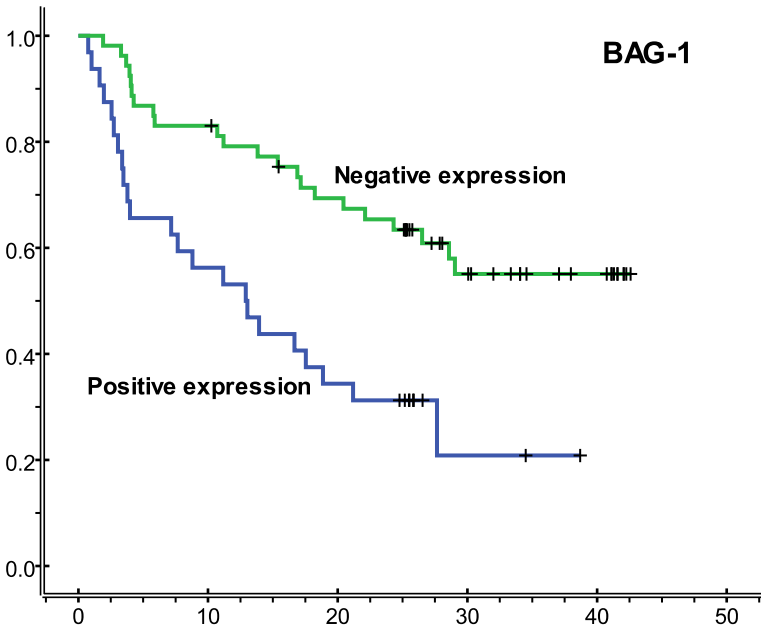

Supplement: MOESM5 [file 9662454]
